# Supplementary material
Source: Research Square preprint supplement (doi:10.21203/rs.3.rs-9591507/v1)
Supplement: Supplementary file 1 [file 2e1c72f5c48480d1f48a1606.docx]

**Supplementary Table 1.** Effects of group, cue reactivity, and order on Glx

|  | *F(1,35)* | *p* | *n2p* |
| --- | --- | --- | --- |
| Cue reactivity | 0.233 | 0.633 | 0.007 |
| Group | 0.352 | 0.557 | 0.010 |
| Order | 3.220 | 0.081 | 0.084 |
| Cue reactivity x Group | 1.983 | 0.168 | 0.054 |
| Cue reactivity x Order | 0.144 | 0.707 | 0.004 |
| Cue reactivity x Group x Order | 0.004 | 0.947 | 0.000 |

**Supplementary Table 2.** Spearman’s rank-order correlations between cue-elicited GABA differences, subjective craving, and cannabis use characteristics

|  | *rs* | *p* |
| --- | --- | --- |
| VAS Craving |  |  |
| *Neutral cues* | -0.08 | 0.663 |
| *Cannabis cues* | **0.43** | **0.011** |
| CUDIT | **0.46** | **0.006** |
| TLFB – Cannabis |  |  |
| *Dose used in last 30 days (grams)* | 0.32 | 0.188 |
| Age of first use (years) | 0.35 | 0.170 |

*Abbreviations:* GABA, gamma-aminobutyric acid; VAS, visual analogue scale; CUDIT, Cannabis Use Disorders Identification Test; TLFB, Timeline Followback.

Significant results are presented in bold.
